# Supplementary material for: The Laccase Gene Family Mediate Multi-Perspective Trade-Offs during Tea Plant (Camellia sinensis) Development and Defense Processes
Source: MDPI journal article supplement (doi:10.3390/ijms222212554), 2021-11-21
Supplement: s1 [file s1]

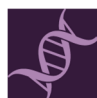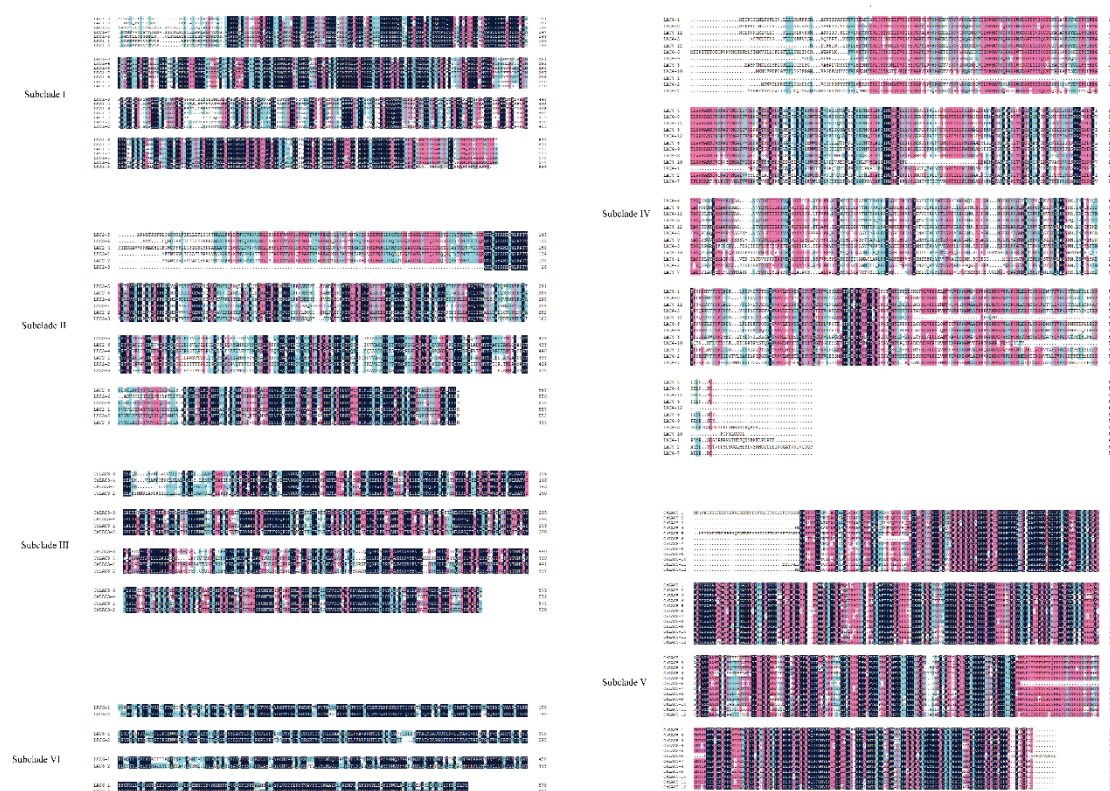

**Figure S1.** Multiple sequence alignment of subgroup 1-6 of CsLAC gene family. Sequence alignment among CsLACs showed the highest identity of 80.99% in group I, identity of 80.44%, 80.25%, 71.41% and 71.16% respectively in group III, group V, group II and group VI. There was the lowest similarity in laccase protein sequences from group IV, sharing an identity of 59.25%.

**Table S1.** The gene ID used for phylogenetic analysis.

| Gene    | Resource                    | Locus number |
|---------|-----------------------------|--------------|
| AtLAC1  | <i>Arabidopsis thaliana</i> | At1g18140    |
| AtLAC2  | <i>Arabidopsis thaliana</i> | At2g29130    |
| AtLAC3  | <i>Arabidopsis thaliana</i> | At2g30210    |
| AtLAC4  | <i>Arabidopsis thaliana</i> | At2g38080    |
| AtLAC5  | <i>Arabidopsis thaliana</i> | At2g40370    |
| AtLAC6  | <i>Arabidopsis thaliana</i> | At2g46570    |
| AtLAC7  | <i>Arabidopsis thaliana</i> | At3g09220    |
| AtLAC8  | <i>Arabidopsis thaliana</i> | At5g01040    |
| AtLAC9  | <i>Arabidopsis thaliana</i> | At5g01050    |
| AtLAC10 | <i>Arabidopsis thaliana</i> | At5g01190    |
| AtLAC11 | <i>Arabidopsis thaliana</i> | At5g03260    |
| AtLAC12 | <i>Arabidopsis thaliana</i> | At5g05390    |
| AtLAC13 | <i>Arabidopsis thaliana</i> | At5g07130    |
| AtLAC14 | <i>Arabidopsis thaliana</i> | At5g09360    |
| AtLAC15 | <i>Arabidopsis thaliana</i> | At5g48100    |
| AtLAC16 | <i>Arabidopsis thaliana</i> | At5g58910    |
| AtLAC17 | <i>Arabidopsis thaliana</i> | At5g60020    |

**Table S2.** Primers used for cloning laccase genes in *Camellia sinensis*.

| Primers    | Purpose | Primer Sequence (5'→3')      |
|------------|---------|------------------------------|
| 1-1RACE3-1 | 5'-RACE | GCGGCAAGTGTGTTGGTATTAGCAGGGG |
| 1-1RACE3-2 | 5'-RACE | AGGGATGACGAAATGGGTAAGGGACA   |
| 1-2RACE5-1 | 5'-RACE | GTGGTATTCGAGGATTGCGGCGGTAG   |
| 1-2RACE5-2 | 5'-RACE | CTCGGCGGATTGCCCCTGTAGTTGA    |
| 1-2RACE3-1 | 3'-RACE | GTGGTTGAAGCGGACGCAATCTAT     |
| 1-2RACE3-2 | 3'-RACE | ACCACTGATTTTCCAGCGAACCCG     |
| 1-3RACE5-1 | 5'-RACE | TTCTCCGCCCCAAAATACTGGTATCCT  |
| 1-3RACE5-2 | 5'-RACE | TGGACAGTTTTAGGGACCTTATTGGCAG |
| 1-4RACE3-1 | 3'-RACE | ATTGAAAAGCCTCGCATCCCCTAAA    |
| 1-4RACE3-2 | 3'-RACE | CGCCGAACAACACGATGGTGAGTAA    |
| 1-5RACE5-1 | 5'-RACE | CACTCTCCAAAGATGATGGGAACCT    |
| 1-5RACE5-2 | 5'-RACE | GCCAGTTTGTATGGGGCATTGAGTT    |
| 1-5RACE3-1 | 3'-RACE | TGGTCCTATAATCATCCGTCCCAAACA  |
| 1-5RACE3-2 | 3'-RACE | GGAGGTTCCCATCATCTTTGGAGAGTG  |
| 1-6RACE3-1 | 3'-RACE | GGTGGCATTTCATGGGAGTTATCGT    |
| 1-6RACE3-2 | 3'-RACE | TTCCTCAACCAGCACTTGCCACGG     |
| 1-7RACE5-1 | 5'-RACE | TGGGGGACATTGGCAGGGTATTGAGC   |
| 1-7RACE5-2 | 5'-RACE | TGGCAAGGCTGAGTGAAGAAGTGGTG   |
| 1-7RACE3-1 | 3'-RACE | GACCGACACGCTTCTCATTACTCCCG   |
| 1-7RACE3-2 | 3'-RACE | GTGCCACATTCTTGATGATTGCCAGG   |
| 2-1RACE5-1 | 5'-RACE | TTGCCATTGTCCACCAAGAATGCCATC  |
| 2-1RACE5-2 | 5'-RACE | CCATCTTTAGTCCCCATGATGTGTGCA  |
| 2-2RACE3-1 | 3'-RACE | ACCCCGCCTCCTAAAAACGCCACCCCAG |
| 2-2RACE3-2 | 3'-RACE | GAGTTCCGTCTGGAGGATGGACTGCTAT |
| 2-3RACE5-1 | 5'-RACE | CCACCGCCACCACACTGTCCATAAA    |
| 2-3RACE5-2 | 5'-RACE | CTGGCGGTTAGGAGGGCATTGTGG     |
| 2-3RACE3-1 | 3'-RACE | AGACCACAAATGCCCTCCTAACCGC    |
| 2-3RACE3-2 | 3'-RACE | CTTTATGGACAGTGTGGTGGCGGTG    |
| 2-4RACE5-1 | 5'-RACE | AAGTCACTGGAGGGCGGTCTGGG      |
| 2-4RACE5-2 | 5'-RACE | TGGTGTGCCAGCGATGGCGAAG       |
| 2-5RACE5-1 | 5'-RACE | GTGGTCCTGGTTTCCCATTGATTGT    |
| 2-5RACE5-2 | 5'-RACE | TTTGGAATGGCACAGCCTGCTCACA    |
| 2-5RACE3-1 | 3'-RACE | TTCTTTCTTGCCACACTAACGCTGC    |
| 2-5RACE3-2 | 3'-RACE | TGTTCTACTGGCGGTTGGACTGCTA    |
| 2-6RACE5-1 | 5'-RACE | CCCTGGGAACATCCCATTCACTGTCA   |
| 2-6RACE5-2 | 5'-RACE | TGCTCACATTCTTCACTTGTATCTGA   |
| 2-6RACE3-1 | 3'-RACE | ACAAGTGAAGAATGTGAGCAGATTGTG  |
| 2-6RACE3-2 | 3'-RACE | TGACAGTGAATGGGATGTTCCCAGGGC  |
| 3-1RACE5-1 | 5'-RACE | GGATTGAAGTTTCCAAAGCCCTGTGCGA |
| 3-1RACE5-2 | 5'-RACE | CTGCCCCAGTTCTTGTAGCCTGCCTCAC |
| 3-2-F      | Clone   | CTTGGGTTGTAGTAGTTTC          |
| 3-2-R      | Clone   | AACCAAAACCAAAACCACCC         |
| 3-3RACE3-1 | 3'-RACE | CCCCAGCCTTGCTCTATTTGCTCTCAT  |
| 3-3RACE3-2 | 3'-RACE | AGACAGAGGGGAACGCCGTGGGCAGAC  |
| 3-4RACE5-1 | 5'-RACE | CCCTGGATTATCAGCGACAAACCG     |
| 3-4RACE5-2 | 5'-RACE | TGCCCATCCACCAACAGGGACATC     |
| 4-1RACE5-1 | 5'-RACE | GGAACACGAAAGGTATTCACTTGCGG   |
| 4-1RACE5-2 | 5'-RACE | GCAGGACATTGCTTTCTTGGAACACT   |

|            |         |                               |
|------------|---------|-------------------------------|
| 4-2RACE5-1 | 5'-RACE | TTGTCTCTGGTGTCCCGCCATCTCTT    |
| 4-2RACE5-2 | 5'-RACE | TTCCTGCGTCCAACACATTAGTCCCT    |
| 4-2RACE3-1 | 3'-RACE | GCCTGAATACATCACACAATGCGGAA    |
| 4-2RACE3-2 | 3'-RACE | CAAGGGACTAATGTGTTGGACGCAGG    |
| 4-3RACE5-1 | 5'-RACE | GACCCCAACAGTGTTCAACTCAGGTG    |
| 4-3RACE5-2 | 5'-RACE | GACCCAACGACATAAAAACTGAACCC    |
| 4-3RACE3-1 | 3'-RACE | GGGTTTCAGTTTTTATGTCGTTGGGTC   |
| 4-3RACE3-2 | 3'-RACE | TCCACCTGAGTTGAACACTGTTGGGG    |
| 4-4RACE5-1 | 5'-RACE | TGAAAAAATAAAGGTGGTTGACTCGGAA  |
| 4-4RACE5-2 | 5'-RACE | TCACCATTGGGTCCATCACAAGAAGT    |
| 4-5RACE5-1 | 5'-RACE | TGATGATTTGCGATGGAGAAAAAGAGAA  |
| 4-5RACE5-2 | 5'-RACE | GCCACCATAGGGTTCCTTCCTCTGTTGA  |
| 4-6RACE5-1 | 5'-RACE | GGATTGGGCACTGGGTAATGTAGGAA    |
| 4-6RACE5-2 | 5'-RACE | GGTGGCATTGTAGGGAGATTGTTGG     |
| 4-7RACE3-1 | 3'-RACE | CTCCGCCAAGCCCATCCCTACCA       |
| 4-7RACE3-2 | 3'-RACE | GGTTCGTACGGAACTAAATACACACG    |
| 4-8RACE5-1 | 5'-RACE | GACCCAAGCCAGTATTCCTCGTGTGAC   |
| 4-8RACE5-2 | 5'-RACE | CATCATTGTCTGTGAAAGCCTGGAAAGA  |
| 4-8RACE3-1 | 3'-RACE | CAACAATCTTTCCAGGCTTTCACGACA   |
| 4-8RACE3-2 | 3'-RACE | ACCGATTTTCATCCTCCACAAGGTTTCAT |
| 5-1RACE5-1 | 5'-RACE | TGACATTGTTGACAAAGGCTTCCATCA   |
| 5-1RACE5-2 | 5'-RACE | ATAGAAGTTGTGGGCTGTTGGTGTGTC   |
| 5-1RACE3-1 | 3'-RACE | ATGACACACCAACAGCCCAAGTTCT     |
| 5-1RACE3-2 | 3'-RACE | CCCATGCGAAGCAGGTTCCAACTGTAG   |
| 5-2RACE5-1 | 5'-RACE | CGGGAGCAATAACAATGAAGTCGGTGA   |
| 5-2RACE5-2 | 5'-RACE | TTGGAAGTGTAGGAGCACCACCGC      |
| 5-2RACE3-1 | 3'-RACE | TCTCCAACGACTATGCCGCAATCAA     |
| 5-2RACE3-2 | 3'-RACE | ACCGACTTCATTGTTATTGCTCCCG     |
| 5-3-F      | Clone   | CGATCTCATCGTTGTATGAAATAC      |
| 5-3-R      | Clone   | AGCAATACGGGAAAAATGTTAG        |
| 5-4RACE3-1 | 3'-RACE | TTCGTACCCATTCCCAAAACCGCA      |
| 5-4RACE3-2 | 3'-RACE | TGCCACTCCATCAACCCACAGA        |
| 6-1RACE5-1 | 5'-RACE | GATTAGGACCCGACCCGCTTTTCAC     |
| 6-1RACE5-2 | 5'-RACE | CCGTTGAGTCAGGCACTTGATTCCG     |
| 6-1RACE3-1 | 3'-RACE | GAATCAAGTGCCTGACTCAACGGG      |
| 6-1RACE3-2 | 3'-RACE | GGGACAAGGCTTTTGGAGGTGAAC      |

Table S3. Primers used for *q*RT-PCR.

| Name   | Forward primer (5'→3') | Reverse primer (5'→3') |
|--------|------------------------|------------------------|
| LAC1-2 | AGACGTGTCAAGGACCCAAC   | ATGGAGATGCAAAGGGTGAG   |
| LAC1-3 | ACAAGTGTCTCCTCCAGTC    | GTTAGGTGGTGTCCCGGTAT   |
| LAC1-4 | CTCAAAACCAAACCGCATTT   | GGACGTTTGCTGGGAATTTA   |
| LAC1-5 | ACAAGATTGTGCCACACCAA   | ATATGGGCATGCCAAAAGAG   |
| LAC1-6 | GGACAGACCACAAACGTCCT   | ATTGGCAGGGTATTGAGCAC   |
| LAC2-1 | GCCACGGTTCAACTTGTTTT   | ATGTGTGCACCTCCAAATGA   |
| LAC2-2 | CCTCGGTGTCAATCCTTGTT   | TTCAGGGGCTATCATTCCAG   |
| LAC2-5 | CCACACTAACGCTGCATTGA   | CCCGGGAACATTCCATTAC    |
| LAC2-6 | TCCATTGGCATGACTTGAAA   | GTGTGCATGCCACCATAAAG   |
| LAC3-1 | GCACCTGTCAAGGTCCAAAT   | AGTGACCGGCTCACATTACC   |
| LAC3-2 | CCCTTCACCACCTCAGTCAT   | GGCTTTTCATGGGGTATCTGA  |
| LAC3-3 | TCCTTCCAATGTCTGAAGTCC  | AAGGTAGGTTGCCACAATGC   |

|        |                        |                       |
|--------|------------------------|-----------------------|
| LAC3-4 | TCCCGAGAAGGAAAAGGAAT   | GACCCTGGAACCAAACCTTCA |
| LAC4-1 | CGGCAAAGAACACCCTGTAT   | TTCGCATTGACTCTTGTTC   |
| LAC4-3 | TATCACTGCAAGCGACCAAG   | AATCTGATGACTGCCCAACC  |
| LAC4-5 | TGCATGTTTACAAGGGTGAT   | CCATGGATTTCTTGGTTGCT  |
| LAC4-6 | ACCCAGGAGTGTGGCTTATG   | TGGAGGCAGCAGTTTTTCTT  |
| LAC4-7 | GGGACAGTTACCACCGAGAA   | CAAGTTCAAATTGGCGGTTT  |
| LAC4-8 | TGGCTTTGCTCTTGAATGTG   | TGCTCTACTCCATGCCAGTG  |
| LAC5-2 | TGACCTTCGTTTCTTTGGCTCT | CAACATCAGCGGAGGTGAGT  |
| LAC5-3 | GTTGAAAACCGACCAGCCAC   | CCCAATGAGGCGCATTTACG  |
| LAC5-4 | TTATGAATGGGCCTCACTGG   | TTGCACCTAATCGTTGCTTG  |
| LAC6-1 | CTTGCTGCCAGGAACACAAC   | CTCCTGTGATTGGGCACTGT  |

Table S4. Sequence information of the reference genes used under different treatments.

| NO | Treatments                                 |            | Reference genes for each treatment | GeneBank Accession Number | Primer sequence (5'–3') forward/reverse                |
|----|--------------------------------------------|------------|------------------------------------|---------------------------|--------------------------------------------------------|
|    | Names                                      | Organs     |                                    |                           |                                                        |
| 1  | tea leaves at different stages of maturity | 1st leaves | <i>CsTBP</i>                       | AT1G55520                 | GGCGGATCAAGTGTGGAAGGGAG                                |
|    |                                            | 2nd leaves |                                    |                           |                                                        |
|    |                                            | 3rd leaves |                                    |                           | ACGCTTGGGATTGTATTCGGCATT                               |
|    |                                            | 4th leaves |                                    |                           |                                                        |
| 2  | <i>T. aurantii</i> infestation             | 2nd leaves | <i>CsACTIN1</i>                    | KA280216.1                | TGGGCCAGAAAGATGCTTATGTAGG<br>ATGCCAGATCTTTTCCATGTCATCC |
| 3  | <i>E. grisea</i> infestation               | 2nd leaves | <i>CsGAPDH1</i>                    | KA295375.1                | TTTTTGGCCTTAGGAACCCAGAGG<br>GGGCAGCAGCCTTATCCTTATCAGT  |
| 4  | JA treatment                               | 2nd leaves | <i>CsGAPDH1</i>                    | KA295375.1                | TTTTTGGCCTTAGGAACCCAGAGG<br>GGGCAGCAGCCTTATCCTTATCAGT  |
| 5  | SA treatment                               | 2nd leaves | <i>CsTBP</i>                       | AT1G55520                 | GGCGGATCAAGTGTGGAAGGGAG<br>ACGCTTGGGATTGTATTCGGCATT    |
